# Supplementary material for: Consumption of Feed Supplemented with Oat Beta-Glucan as a Chemopreventive Agent against Colon Cancerogenesis in Rats
Source: MDPI journal article supplement (doi:10.3390/nu16081125), 2024-04-11
Supplement: s1 [file s1]

**Table S1.** Product composition of AIN-93M experimental feeds declared by the producer (ZooLab, Sędziszów, Poland).

| Ingredient (g/kg)             | AIN-93M feed composition |        |        |
|-------------------------------|--------------------------|--------|--------|
|                               | OBG_0                    | OBG_1  | OBG_3  |
| Corn starch                   | 467.49                   | 456.49 | 436.49 |
| Casein                        | 140                      | 140    | 140    |
| Maltodextrin                  | 155                      | 155    | 155    |
| Sucrose                       | 100                      | 100    | 100    |
| Soybean oil                   | 40                       | 40     | 40     |
| Fiber                         | 50                       | 50     | 50     |
| Mineral mix (AIN-93g-MX)      | 35                       | 35     | 35     |
| Vitamin mix (AIN-93-VX)       | 10                       | 10     | 10     |
| Oat beta-glucan               | 0                        | 11     | 31     |
| Choline Hydrogen Tartrate     | 2.5                      | 2.5    | 2.5    |
| Tert-butylhydroquinone (TBHQ) | 0.008                    | 0.008  | 0.008  |

**Table S2.** Declared and analyzed composition of macronutrients (% w/w) in experimental feeds (for analyzed composition mean  $\pm$  SD).

| Nutrients in feeds                        | Declared composition |                   |                   | Analyzed Composition |                 |                  |
|-------------------------------------------|----------------------|-------------------|-------------------|----------------------|-----------------|------------------|
|                                           | OBG_0                | OBG_1             | OBG_3             | OBG_0                | OBG_1           | OBG_3            |
| Protein                                   | 14.0                 | 14.0              | 14.0              | 12.86 $\pm$ 1.79     | 12.73 $\pm$ 1.8 | 12.84 $\pm$ 1.80 |
| Carbohydrates                             | 72.25                | 71.15             | 69.15             | 75.9*                | 76.2*           | 75.6*            |
| Fat                                       | 4.0                  | 4.0               | 4.0               | 4.5 $\pm$ 1.4        | 4.4 $\pm$ 1.3   | 4.6 $\pm$ 1.4    |
| Fiber                                     | 5.0                  | 5.0               | 5.0               | 3.8 $\pm$ 0.5        | 4.0 $\pm$ 0.7   | 4.1 $\pm$ 0.7    |
| beta-glucan                               | 0.0                  | 1.1               | 3.1               | 0.1 $\pm$ 0.02       | 1.06 $\pm$ 0.09 | 3.22 $\pm$ 0.56  |
| Metabolizable energy [MJ/kg]<br>(kcal/kg) | 16.52<br>(3946,7)    | 16.22<br>(3873,4) | 15.66<br>(3740,1) | –                    | –               | –                |

\* The carbohydrates content was calculated from the difference based on the content of water, protein, fat and ash

**Table S3.** Results of histopathological examination of intestinal crypts.

| Rat number | Grup    | Feed  | Results of histopathological examination of intestinal crypts. |
|------------|---------|-------|----------------------------------------------------------------|
| 39         | Control | OBG_0 | No changes in crypt epithelial cells                           |
| 40         | Control | OBG_0 | No changes in crypt epithelial cells                           |
| 41         | Control | OBG_0 | No changes in crypt epithelial cells                           |
| 42         | Control | OBG_0 | No changes in crypt epithelial cells                           |
| 43         | Control | OBG_0 | No changes in crypt epithelial cells                           |

|    |         |       |                                      |
|----|---------|-------|--------------------------------------|
| 44 | Control | OBG_0 | No changes in crypt epithelial cells |
| 45 | Control | OBG_0 | No changes in crypt epithelial cells |
| 25 | Control | OBG_1 | No changes in crypt epithelial cells |
| 26 | Control | OBG_1 | No changes in crypt epithelial cells |
| 27 | Control | OBG_1 | No changes in crypt epithelial cells |
| 28 | Control | OBG_1 | No changes in crypt epithelial cells |
| 29 | Control | OBG_1 | No changes in crypt epithelial cells |
| 30 | Control | OBG_1 | No changes in crypt epithelial cells |
| 31 | Control | OBG_1 | No changes in crypt epithelial cells |
| 32 | Control | OBG_3 | No changes in crypt epithelial cells |
| 33 | Control | OBG_3 | No changes in crypt epithelial cells |
| 34 | Control | OBG_3 | No changes in crypt epithelial cells |
| 35 | Control | OBG_3 | No changes in crypt epithelial cells |
| 36 | Control | OBG_3 | <b>Hyperplasia</b>                   |
| 37 | Control | OBG_3 | No changes in crypt epithelial cells |
| 38 | Control | OBG_3 | No changes in crypt epithelial cells |
| 17 | CRC     | OBG_0 | <b>Hyperplasia</b>                   |
| 18 | CRC     | OBG_0 | <b>Hyperplasia</b>                   |
| 19 | CRC     | OBG_0 | <b>Hyperplasia</b>                   |
| 20 | CRC     | OBG_0 | No changes in crypt epithelial cells |
| 21 | CRC     | OBG_0 | No changes in crypt epithelial cells |
| 22 | CRC     | OBG_0 | No changes in crypt epithelial cells |
| 23 | CRC     | OBG_0 | <b>Hyperplasia</b>                   |
| 24 | CRC     | OBG_0 | <b>Hyperplasia</b>                   |
| 1  | CRC     | OBG_1 | <b>Hyperplasia</b>                   |
| 2  | CRC     | OBG_1 | No changes in crypt epithelial cells |
| 3  | CRC     | OBG_1 | No changes in crypt epithelial cells |
| 4  | CRC     | OBG_1 | No changes in crypt epithelial cells |
| 5  | CRC     | OBG_1 | No changes in crypt epithelial cells |
| 6  | CRC     | OBG_1 | <b>Hyperplasia</b>                   |
| 7  | CRC     | OBG_1 | No changes in crypt epithelial cells |
| 8  | CRC     | OBG_1 | No changes in crypt epithelial cells |
| 9  | CRC     | OBG_3 | No changes in crypt epithelial cells |
| 10 | CRC     | OBG_3 | No changes in crypt epithelial cells |
| 11 | CRC     | OBG_3 | No changes in crypt epithelial cells |
| 12 | CRC     | OBG_3 | No changes in crypt epithelial cells |
| 13 | CRC     | OBG_3 | No changes in crypt epithelial cells |
| 14 | CRC     | OBG_3 | <b>Hyperplasia</b>                   |
| 15 | CRC     | OBG_3 | No changes in crypt epithelial cells |
| 16 | CRC     | OBG_3 | No changes in crypt epithelial cells |
